# Supplementary material
Source: publisher figshare collection journal article supplement (https://sage.figshare.com/ndownloader/files/17763377)
Supplement: Supplementary file 1 [file 17763377]

**Table 3 Methodological Challenges of Included Studies, 2019**

| First Author           | Challenges            |          |                 |                      |                          |                           |             |                      |                    |                      |                                  |
|------------------------|-----------------------|----------|-----------------|----------------------|--------------------------|---------------------------|-------------|----------------------|--------------------|----------------------|----------------------------------|
|                        | Ethical Concerns      | Time     | Data is Limited | Community Screenings | Social Desirability Bias | Results Not Generalizable | Recruitment | Maintaining Interest | Space Availability | Technical Challenges | Distilling Large Amounts of Data |
| <b>Akre</b>            |                       |          | <i>x</i>        |                      |                          |                           |             |                      |                    |                      |                                  |
| <b>Catalani</b>        | <i>x</i>              | <i>x</i> |                 | <i>x</i>             | <i>x</i>                 |                           |             |                      |                    |                      |                                  |
| <b>Chung</b>           |                       |          |                 |                      |                          | <i>x</i>                  |             |                      |                    |                      |                                  |
| <b>Edinburgh</b>       |                       |          |                 |                      |                          | <i>x</i>                  |             |                      |                    |                      |                                  |
| <b>Gibson</b>          |                       | <i>x</i> |                 |                      |                          |                           | <i>x</i>    |                      |                    |                      |                                  |
| <b>Gupta</b>           |                       | <i>x</i> |                 |                      |                          |                           |             | <i>x</i>             | <i>x</i>           |                      |                                  |
| <b>Linz</b>            |                       |          |                 |                      |                          |                           |             |                      |                    | <i>x</i>             |                                  |
| <b>Lundstrom</b>       | <i>x</i>              |          |                 |                      | <i>x</i>                 |                           |             |                      |                    | <i>x</i>             |                                  |
| <b>Mirza</b>           | <i>none discussed</i> |          |                 |                      |                          |                           |             |                      |                    |                      |                                  |
| <b>Moletsane</b>       | <i>x</i>              | <i>x</i> |                 |                      |                          |                           |             |                      |                    | <i>x</i>             |                                  |
| <b>Norton</b>          |                       |          |                 |                      |                          | <i>x</i>                  |             |                      |                    |                      |                                  |
| <b>Peters</b>          | <i>x</i>              | <i>x</i> | <i>x</i>        |                      |                          |                           |             |                      |                    | <i>x</i>             | <i>x</i>                         |
| <b>Petros</b>          |                       |          | <i>x</i>        |                      |                          |                           |             |                      |                    | <i>x</i>             | <i>x</i>                         |
| <b>Sagan</b>           | <i>x</i>              |          | <i>x</i>        |                      |                          |                           |             |                      |                    |                      |                                  |
| <b>Söderström</b>      |                       | <i>x</i> |                 |                      |                          | <i>x</i>                  |             |                      |                    |                      |                                  |
| <b>Treffry-Goatley</b> | <i>x</i>              |          | <i>x</i>        |                      |                          |                           |             |                      |                    | <i>x</i>             | <i>x</i>                         |
| <b>Vega</b>            | <i>none discussed</i> |          |                 |                      |                          |                           |             |                      |                    |                      |                                  |
| <b>Vieira</b>          |                       | <i>x</i> |                 |                      | <i>x</i>                 | <i>x</i>                  |             |                      |                    |                      |                                  |
| <b>Warren (2016)</b>   |                       | <i>x</i> |                 |                      |                          | <i>x</i>                  |             |                      |                    |                      | <i>x</i>                         |
| <b>Warren (2014)</b>   | <i>x</i>              | <i>x</i> |                 |                      |                          | <i>x</i>                  |             |                      |                    |                      | <i>x</i>                         |
