# Supplementary material
Source: publisher figshare collection journal article supplement (https://sage.figshare.com/ndownloader/files/17763377)
Supplement: Supplementary file 2 [file 17763377]

**Table 2 Methodological Strengths of Included Studies, 2019**

| First Author           | Strengths             |               |           |              |            |                         |         |                   |           |                       |
|------------------------|-----------------------|---------------|-----------|--------------|------------|-------------------------|---------|-------------------|-----------|-----------------------|
|                        | Empowerment           | Advocacy Tool | Rich Data | Sensory Data | New Skills | Equitable Participation | Comfort | Emic Perspectives | Authentic | Encourages Reflection |
| <b>Akre</b>            | x                     |               | x         |              |            |                         | x       | x                 |           |                       |
| <b>Catalani</b>        |                       | x             | x         | x            | x          | x                       | x       | x                 |           |                       |
| <b>Chung</b>           |                       |               | x         |              |            |                         |         |                   |           |                       |
| <b>Edinburgh</b>       | <i>none discussed</i> |               |           |              |            |                         |         |                   |           |                       |
| <b>Gibson</b>          | x                     |               | x         |              |            |                         | x       | x                 | x         | x                     |
| <b>Gupta</b>           | x                     | x             |           |              | x          |                         | x       | x                 |           | x                     |
| <b>Linz</b>            |                       | x             | x         |              |            |                         | x       | x                 | x         | x                     |
| <b>Lundstrom</b>       |                       |               | x         |              |            |                         |         |                   |           | x                     |
| <b>Mirza</b>           | <i>none discussed</i> |               |           |              |            |                         |         |                   |           |                       |
| <b>Moletsane</b>       |                       | x             |           |              | x          |                         | x       |                   | x         |                       |
| <b>Norton</b>          | <i>none discussed</i> |               |           |              |            |                         |         |                   |           |                       |
| <b>Peters</b>          | x                     | x             |           |              | x          |                         |         |                   |           | x                     |
| <b>Petros</b>          |                       |               | x         | x            |            |                         |         | x                 |           | x                     |
| <b>Sagan</b>           | x                     |               |           |              |            |                         | x       |                   |           | x                     |
| <b>Söderström</b>      | <i>none discussed</i> |               |           |              |            |                         |         |                   |           |                       |
| <b>Treffry-Goatley</b> | x                     |               |           |              |            |                         | x       |                   |           | x                     |
| <b>Vega</b>            | <i>none discussed</i> |               |           |              |            |                         |         |                   |           |                       |
| <b>Vieira</b>          |                       | x             |           |              |            |                         |         |                   | x         | x                     |
| <b>Warren (2016)</b>   | x                     | x             | x         |              |            |                         | x       |                   |           | x                     |
| <b>Warren (2014)</b>   |                       | x             |           |              | x          |                         |         |                   | x         |                       |
