# Supplementary material
Source: publisher figshare collection journal article supplement (https://sage.figshare.com/ndownloader/files/17763377)
Supplement: Supplementary file 3 [file 17763377]

Archive with 5 entries (5 files):
- Supplemental Material/Box 1_JULY_27_2019.pdf
- Supplemental Material/Figure 1_JULY_25_2019.pdf
- Supplemental Material/Table 1_Organized by Method_July_25_2019.xlsx
- Supplemental Material/Table 2_July_25_2019.pdf
- Supplemental Material/Table 3_July_25_2019.pdf
