# Supplementary material
Source: publisher figshare collection journal article supplement (https://sage.figshare.com/ndownloader/files/17763377)
Supplement: Supplementary file 3 [file 17763377 › Supplemental Material/Box 1_JULY_27_2019.pdf]

**Box 1.** Data Extraction Fields, Film Methods in Public Health Research, 2019

1. Title
2. Author
3. Year
4. Country of study
5. Public health topic
6. Sample size
7. Sample population
8. Type of method used
9. Steps in applying the method
10. Steps in analyzing the data
11. Strengths of the method
12. Challenges associated with the method
