# Supplementary material
Source: publisher figshare collection journal article supplement (https://sage.figshare.com/ndownloader/files/17763377)
Supplement: Supplementary file 3 [file 17763377 › Supplemental Material/Figure 1_JULY_25_2019.pdf]

**Figure 1.** PRISMA Flow Diagram, Film Research Methods in Public Health, 2019

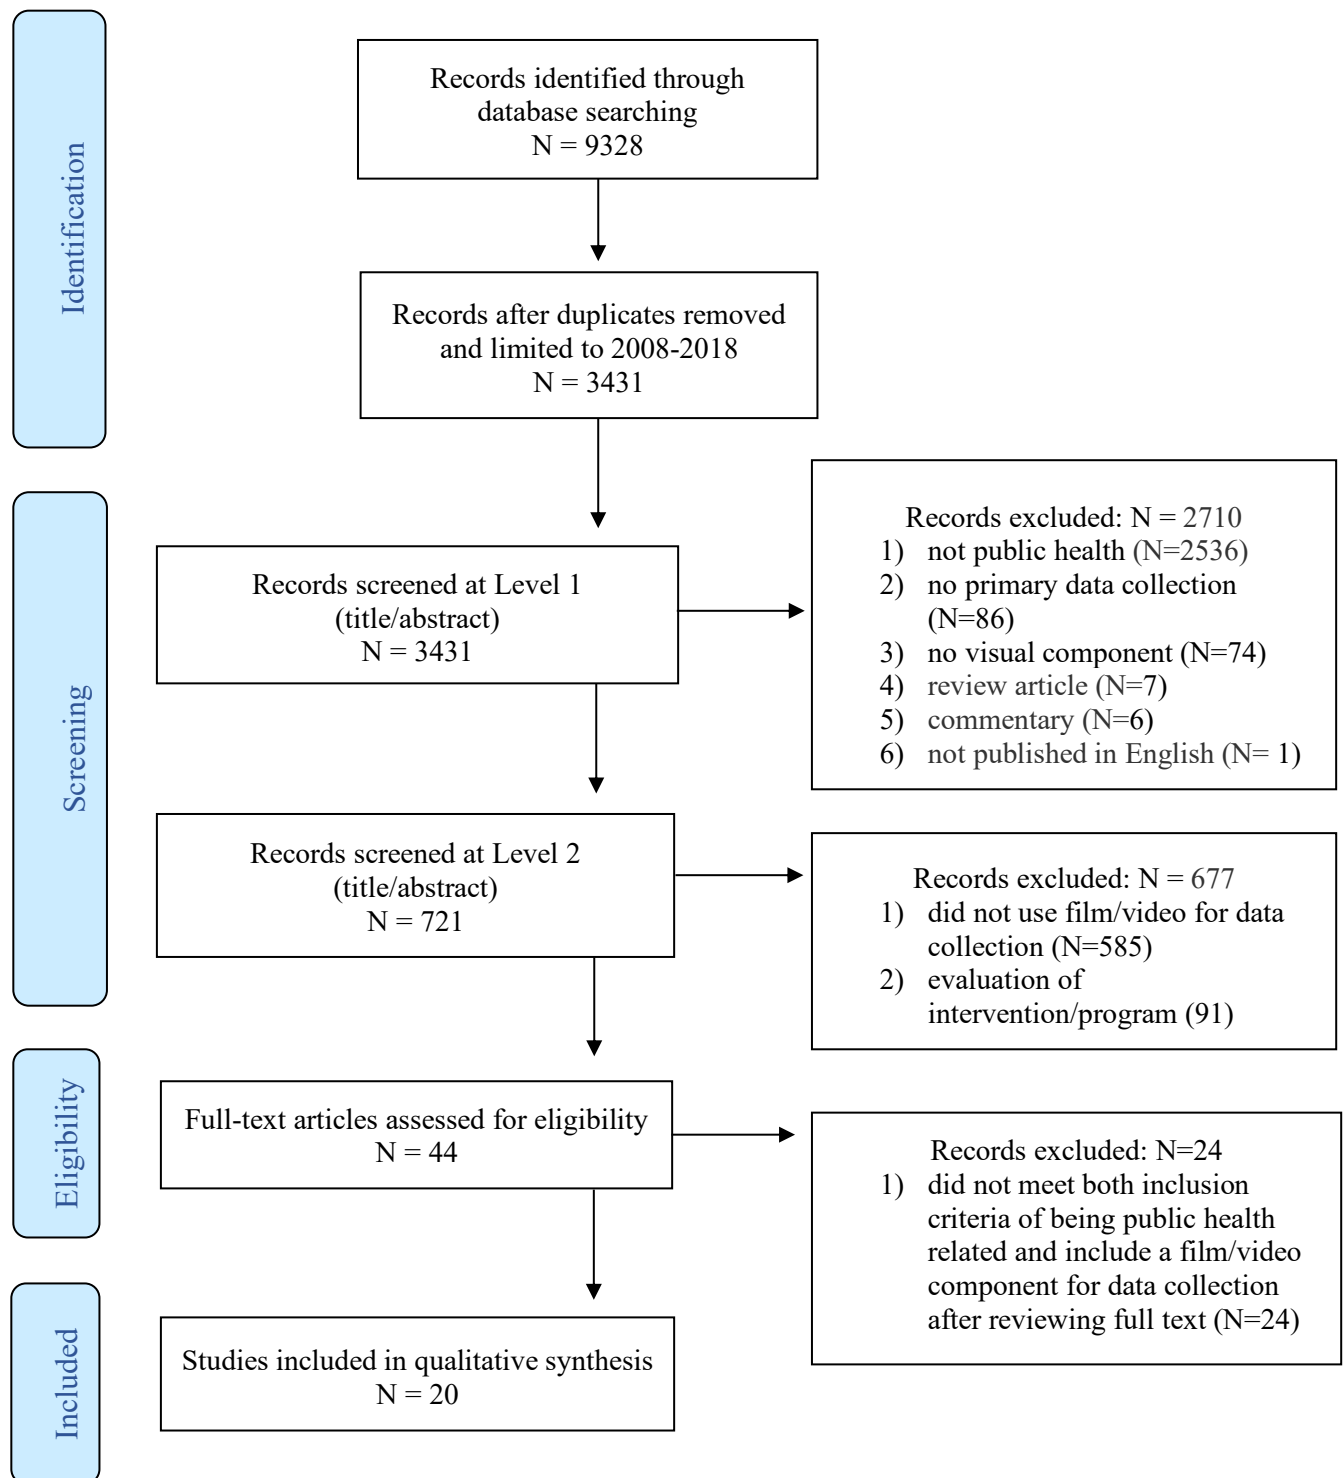

Note: PRISMA = Preferred Reporting Items for Systematic Reviews and Meta-Analyses.
