# Supplementary material
Source: publisher figshare collection journal article supplement (https://sage.figshare.com/ndownloader/files/17763377)
Supplement: Supplementary file 3 [file 17763377 › Supplemental Material/Table 1_Organized by Method_July_25_2019.xlsx]

## Sheet: Sheet1
Table 1. Overview of Film/Video Studies and Steps for Implementation and Analysis, 2019
Film/Video Method	Author(s), (Year), Country	Title	Journal	Study Setting, Participants, and Sample Size	Public Health Topic(s)	Steps for Implementing Method and Length of Engagement	Steps for Analysis
Videovoice - Participatory research and advocacy technique that trains lay community members in videography and outreach	Catalani, Veneziale, Campbell, Herbst, Butler, Springgate, and Minkler (2012), United States	Videovoice: Community Assessment in Post-Katrina New Orleans	Health Promotion Practice	- Central City neighborhood of New Orleans, post hurricane Katrina. - n=10 (28 to 78 years, 70% male, 80% African American, annual household income < $2,000 - < $50,000, education high school - graduate school)	Environment and neighborhood effects on health	- Training - Weeklong training and orientation on Videovoice, project objectives and timeline, community health concerns, ethics and safety in video production, and video equipment operation. - Partners systematically collected footage and attended weekly discussion and training sessions for 12 weeks. - Participants collected environmental footage, then conducted 37 videotaped in-depth interviews…	- Participatory analysis was used. Engaged community and academic partners in a three-stage process: selecting, contextualizing, and codifying (Wang & Burris, 1997). Selecting involved choosing those clips of footage that most accurately reflected community needs and assets; contextualizing involved engaging in critical discussion using the SHOWeD technique, and participants’ own questions, to un…
Videovoice	Warren, Knight, Holl, Gupta (2014), United States	Using Videovoice Methods to Enhance Community Outreach and Engagement for the National Children's Study	Child Health Promotion	- Communities in Cook County Illinois were randomly selected using the National Children’s Study (NCS). Communities predominantly inhabited by ethnic minority populations were selected based on (a) having a high population of Latinos, (b) a high concentration of children living in poverty, (c) requested NCS materials in languages other than English, (d) lacked identifiable outreach opportunities,…	Child and adolescent health and development; Environment and neighborhood effects on health	- Training - Six weekly two-hour training sessions, covering research ethics, interviewing techniques, and videography. - Participants conducted videotaped interviews with key stakeholders in their respective communities. - Footage was reviewed at subsequent training sessions, using a three-part participatory visual analysis used by C. E. Catalani et al. (2012) and originally detailed by Wang and…	‘- The pre/post training session questionnaires were analyzed quantitatively using paired-sample t tests to compare participants’ pre- and post- test scores. - Videovoice training sessions were recorded and transcribed. These, along with the videos from the field, were coded qualitatively for themes. - In addition, participants recorded two videotaped “debriefings” after each session. These debri…
Videovoice	Warren, Dyer, Blumenstock, and Gupta (2016), United States	Leveraging Mobile Technology in a School-Based Participatory Asthma Intervention: Findings From the Student Media-Based Asthma Research Team (SMART) Study	American Journal of Health Education	- Back of the Yards community on the southwest side of Chicago, Illinois. A public elementary school was selected based on previous work identifying this community as having elevated asthma prevalence rates relative to surrounding areas. - Participants were 7th and 8th grade students with both an asthma diagnosis of any severity and asthma medications (e.g. Albuterol, Fluticasone) on file. - n=10…	Asthma; Adolescent health	‘- Participants were loaned a Samsung Galaxy Player 5.0, an internet-enabled mobile device that permitted capture of high-resolution photo and video. Nonessential functions on the device were blocked. - The first phase (four weeks) focused on using Photovoice/Videovoice methods to explore the local community and how a variety of factors at the individual, school, home, and neighborhood levels can…	- Statistical analysis was completed for scales and surveys. - Video footage was not explicitly analyzed in this paper.
Video Diaries - Form of visual ethnography where the informant gets instructions, but chooses where and when documenting is carried out to provide a full description of social life	Lundstrom, Ekborg, and Ideland (2012), Sweden	To Vaccinate or Not to Vaccinate: How Teenagers Justified Their Decision	Cultural Study of Science Education	- Students were recruited from five different programs of study in upper secondary school, and from five different schools. - n= 7(ages ranged from 17 to 19 years, 4 girls and 3 boys)	Vaccination; Adolescent health; Health decision-making	- Participants were given a video player and an mp3 player. One student wanted to take photos instead of videos and was instructed to do so. Furthermore, participants could write diary entries instead of filming if they wanted. - The informants were requested to document situations in which they consider science knowledge to be of importance in their daily life outside school. Additionally, all s…	‘- Video diaries were analyzed for key phrases to describe the student's views, which were then grouped into themes.
Video Diaries	Norton, Thomas, Lomax, and Dudley-Brown (2012), United States	Patient Perspectives on the Impact of Crohn's Disease: Results from Group Interviews	Patient Preference and Adherence	- Participants were to have a physician’s diagnosis of Crohn's Disease (CD), have self-reported moderate to severe CD, be under the care of a specialist, be taking medication to treat CD, and agreed to film a video diary and participate in a focus group. - Biologic-experienced participants (23) were those currently receiving biologic therapy for their CD, and biologic-naïve participants (21) were…	Crohn’s disease; Quality of life	'- Participants were provided Flip VideoTM cameras with instructions to create 30-minute video diaries that depicted a day in their life as a patient with CD. Participants were asked to submit an accompanying monologue describing their experiences. -Small, in-person group discussions were held at central locations in Chicago, Illinois; New York, New York; and Dallas, Texas. Twelve groups were spl…	‘- Data from the videos and group interviews were summarized qualitatively by grouping similar answers and quotations.
Video Diaries	Edinburgh, Garcia, and Saewyc (2013), United States	It's Called "Going Out to Play": A Video Diary Study of Hmong Girls' Perspectives on Running Away	Health Care Women International	- Hmong ( an Asian ethnic tribal group from the mountainous regions of Southeast Asia ) adolescent girls who had run away from home, been sexually assaulted, and were treated at an urban children's hospital in the Midwestern U.S. with a large Hmong population. - Exclusion criteria: (a) incarcerated; (b) were placed in foster-care; and (c) did not speak English. - n=11 (ages ranged from 13 and 16 …	Adolescent health; Sexual assault, exploitation, and violence; Immigrant and refugee health	- Video diaries were completed by each adolescent girl during the first three months of their enrollment in the Runaway Intervention Program using digital video recorders loaned to them by the study team. - The diaries were recorded in their home in a space chosen by the teen, or in a private room in the clinic. - The teens were provided with open-ended questions to respond to and were asked to r…	‘- All video data were reviewed multiple times in their entirety by at least one member of the research team. - Spoken words in the video diaries were transcribed verbatim. - The data were imported into Atlas.ti. - The analysis followed a coding process outlined by Sandelowski, Docherty, and Emden (1997), which systematically labels data descriptively, and then organizes the codes into groups, or…
Video Intervention/Prevention Assessment (VIA) - Participants' experiences and expressions are shown and told by them while living their day-to-day lives	Chung, Sherman, Goodman, Bickham, and Rich (2013), United States	Exploring the Perspectives of Obese Adolescent Girls	Qualitative Health Research	- Adolescent girls with obesity and with normal-weight were recruited from adolescent primary care and obesity specialty clinics at a large children’s hospital in the northeastern United States from 2007 to 2009. - Exclusion criteria: (a) genetic, metabolic, or other medical conditions that predisposed to becoming over- weight; (b) restrictive eating disorders; (c) cognitive or physical impairmen…	Obesity; Adolescent health	'- Participants were asked to teach their clinicians about their experiences by documenting their lives on video, revealing issues they faced, how they responded to them, and what they thought. Researchers encouraged participants to show and tell anything that revealed the realities of their lives and that might affect their weight and health. - Next, participants were given standardized suggesti…	‘- Following the tenets of grounded theory, authors identified key themes regarding the participants’ health and well-being based on what they recorded and said. - Authors standardized the VIA logging process to maintain the richness of the original data in as many dimensions as possible (Rich et al., 2005; Rich & Patashnick, 2002). Through logging, they organized the textual documentation of the…
Video Intervention/Prevention Assessment (VIA)	Akre, Light, Sherman, Polvinen, and Rich (2015), United States	What Young People with Spina Bifida Want to Know about Sex, and Aren’t Being Told	Child: Care, Health and Development	- Individuals with spina bifida (SB); all levels of SB and abilities were eligible; mobility of included participants ranged from using crutches and leg braces to wheelchairs - n= 14 (ages ranged from 13-28 years, 7 females and 7 males)	Sexual health; Adolescent health	- Participants were loaned a video camcorder for a period of 8 to 12 weeks and trained to shoot VIA visual narratives. Participants were encouraged to record any and all aspects of their lives that they wanted to share, with the knowledge that the videos would be used to educate the medical community about their experience living with SB. - Participants were provided with written prompts, includi…	- VIA visual narratives were analyzed using Grounded theory (Glaser, 1992) to develop, structure, examine, and code an array of prevalent themes from an emic point of view. - Videos were screened 2 to 4 times, objective scenes recorded, dialogue transcribed verbatim, and notes/memos made on contextual and subjective aspects observed by the coder. - Data was managed using NVivo, a qualitative anal…
Autovideography - Turns cameras over directly to participants and invites them to make recordings in their natural settings without the presence of any researcher	Linz, Hanrahan, DeCesaris, Petros, and Solomon (2016), United States	Clinical Use of an Autovideography Intervention to Support Recovery in Individuals with Severe Mental Illness	Journal of Psychosocial Nursing	- Individuals with a self-reported diagnosis of Severe Mental Illness (SMI), who had graduated from a 12-week recovery education program participated. The psychiatric diagnoses among both groups were: major depression, psychotic disorder, obsessive- compulsive disorder, bipolar disorder, and posttraumatic stress disorder. - Exclusion criteria: (a) incapable of providing informed consent by agency…	Severe Mental Illness	- Participants were loaned inexpensive video cameras, trained in their use by a research assistant, and provided a handbook of technical information. - Participants were asked to create videos to “tell us about your recovery” and informed that they could shoot 8 hours of video over a 4-week period. Additional consent forms were provided to participants so that they could choose to interview and r…	‘- Videos were transcribed by two members of the research team and reviewed for accuracy by a third team member. - The transcripts were reviewed and checked against the original videos for accuracy, emotional tone, and analysis of verbal and non-verbal data by two qualitative analysts with the use of NVivo software version 10. - Patterns were identified and codes developed, recoded, and collapsed…
Autovideography	Petros, Solomon, Linz, DeCesaris, and Hanrahan (2016), United States	Autovideography: The Lived Experience of Recovery for Adults with Serious Mental Illness	Psychiatry Quarterly	- Eligible participants successfully completed a 12-week recovery and education course for Serious Mental Illness. - n= 12 (limited to 6 for analysis) (participants were 18 years or older)	Mental health; Severe Mental Illness	- Participants were randomly assigned to control and experimental condition. The 12 adults in the experimental condition were loaned inexpensive video cameras along with technological training on their use with the invitation to ‘‘Tell us about your recovery’’ through autovideography. - Researchers worked with participants to create films over a 4-week period of time, with a booster meeting after…	- All videos were transcribed by two members of the research team and reviewed for accuracy by a third member. - Researchers used NVivo 9 and 10 software packages to manage and analyze data. - Authors initiated thematic analysis by reviewing transcripts and attempting to bracket out previous knowledge of recovery in an inductive approach to understand participants’ experiences as they were lived.…
Participatory Video-making - Participants are involved in constructing their own videos with researchers facilitating and assisting with video-making where necessary	Moletsane, Mitchell, De Lange, Stuart, Buthelezi, and Taylor (2009), South Africa	What can a Woman do with a Camera? Turning the Female Gaze on Poverty and HIV and AIDS in Rural South Africa	International Journal of Qualitative Studies in Education	- Producers included parents and community health workers in a rural KwaZulu-Natal province. - The participants in the larger project (screening of the film) included approximately 80 high school students, teachers, community health care workers, and several parents from two rural schools. - n=7 (ages ranged from early 20s to early 40s, 6 women and 1 man)	HIV /AIDS	- Video workshops were organized in two schools to train participants. These workshops involved 30–35 participants in each school, organized into small groups of five to six participants. Producers helped the small groups create the rough cut of their video by working the equipment and guiding their discussion. The participants were involved in constructing their own videos, from story-boarding t…	‘ - Authors used textual analysis to look at three levels of textuality: the primary text, the production text, and audience text. - Adapting Fiske’s (1989) notion of audience texts to include the producers themselves as audience of their own videos, authors solicited and studied audience responses to the video documentary as research data. - In so doing authors looked at several layers of textua…
Filming first person narratives - Participants were trained to develop skills to interview and film each other, and to photograph artefacts, transcribe interviews and contribute to the editing of a final film	Sagan (2012), England	Connection and Reparation: Narratives of Art Practice in the Lives of Mental Health Service Users	Counselling Psychology Quarterly	- Participants, each of whom had a long-term history of mental ill health and had also been involved in artistic activity for a number of years, were recruited mainly through community arts organizations, word of mouth and the community arts team at the South London and Maudsley Hospital. - Each participant acknowledged a difficult past, with trauma, abuse, substance abuse, homelessness and pover…	Mental health	‘-Participants were trained to develop skills to interview and film each other, and to photograph artifacts, transcribe interviews and contribute to the editing of a final film. - Each person chose for her/himself the level of involvement in which they were comfortable. Such flexibility was also important as ill-health, depression, relapse and self-doubt sometimes stole through the team, casting …	- Video narratives were transcribed verbatim and loaded into NVivo software, along with the audiovisual recordings and photographs of work, in order to enable a more complete analysis. - From the transcriptions, the audiovisual recordings and images of the artworks spoken of, selections of the narrative strands are presented in the results section as different themes.
Photovoice and Public Service Announcement Videos (PSAs) - Photovoice is a well-documented method that provides participants with cameras and brief photography training to record and reflect on the topic of interest. This study built upon Photovoice with a PSA video exercise	Gupta, Lau, Springston, Warren, Mears, Dunford, Sharp, and Holl (2013), United States	Perceived Factors Affecting Asthma Among Adolescents: Experiences and Findings From the Student Asthma Research Team Pilot Study	Journal of Asthma and Allergy Educators	'- Students with asthma in grades 8-12 in an inner-city Chicago high school with high asthma rates and poor asthma morbidity were eligible to participate. Eleven of the 15 students stored emergency asthma medication at the school health center; 6 students stored daily controller medication at the school health center. - n= 15 (ages ranged from 13 to 18 years, 73% female, 80% African American and …	Asthma	'- Two initial sessions were held to introduce students to the research team, research goals, the overall program plan, and fundamentals of ethnographic research. - In subsequent sessions, students were given basic training from a photography instructor along with a digital camera, a journal, and a photography log notebook, as well as daily photography and journaling assignments. - Over the remai…	‘- Two research assistants independently reviewed the students’ journal entries and photographs to draft preliminary coding schemes. - Initial drafts were reconciled to form a final coding scheme. - The principal investigator and a third research assistant then independently coded the qualitative data using the agreed-on codes. Differences were reconciled between the principal investigator and th…
Video-elicitation - The process of watching videos with participants to facilitate discussion on a topic	Vieira, O'Rourke, Merck, and Hunter (2013), Canada	Using Video-elicitation to Assess Risks and Potential Falls Reduction Strategies in Long Term Care	Disability and Rehabilitation	- One long-term care facility in Western Canada was selected because of its size, location and interest in participating in the study. The facility had 224 continuing-care beds, including private and semi-private rooms. - Participants included volunteer residents (n=6), health care providers (n= 6) and family members (n=4). Inclusion criteria for residents were: ability to speak and understand En…	Risk and fall reduction; Aging	- Before starting the video sessions, the first author visited the long-term care facility on 4 separate occasions to observe the environment, practices, and resident transfer procedures, to take field notes, to get to know the staff members and management team, and to establish a collaborative relationship with the stakeholders. - The study idea was presented during management team meetings, sta…	‘- A research assistant transcribed audio from interviews and video-elicitation sessions. - Related field notes were entered at the beginning of the transcripts. - Atlas.ti software was used to organize the data during our iterative analysis of the video and textual data. - For each case, two team members independently listened to the audio-files while reading the transcripts to correct any inacc…
Reflecting on Student-Produced Videos - Practices were videotaped by students, then were screened and discussed as a group led by the authors	Vega, Gutiérrez, Rodríguez, and De Iturbe (2015), Mexico	Inhalant Use in the Sociality Practices of Two Groups of Students at Public Middle Schools	Salud Mental	- n=12 (all participants were 14 years old, 7 male and 5 female students)	Inhalant abuse; Adolescent health	‘- Seven sociality practices videotaped by students were selected. - Students talked about the videos while in discussion groups, led by the authors. - One year later, 4 discussion groups were made with the students in the videos. - Participants were explained the rules for the discussion (not insulting others, referring to the participants using pronouns and waiting for their turn to speak) and …	‘- To analyze the videos, photo elicitation visual methodology was used. - This method suggests the use of drawn, photographic, film or videotape images to be interpreted by their creators, actors, witnesses or by others that may be of interest for the research, on in-depth interviews and/or in discussion groups attempting to explore the meanings of the images, what is going on within them as wel…
Content Analysis of Patient Produced Video Diaries - Participants were given a camcorder to make a film about their experiences. Content analysis was completed of individual video diaries	Gibson, Hibbins, Grew, Morgan, Pearce, Stark, and Fern (2016), England		Psycho-Oncology	- JTV Cancer Support (JTV; https://jtvcancersupport.com/) is an online community for young people with cancer where patients are approached around the time of their diagnosis and invited to participate in the project where they are offered a camcorder, which they keep and use to make a film about their experiences. At the time of this study, the site included over 1620 films and was a rich source…	Cancer; Coping mechanisms	- Films were complete and published in the online database at the time of data collection. The study team selected video diaries to conduct a content analysis. - Total length: Not reported	‘- Each video diary was analyzed using qualitative content analysis. - Narrative materials were broken down into smaller units of content on the proforma to capture the essence of the patient’s narrative (coding and noting). A proforma was developed by paired researchers independently viewing two films each directly from the website. Discussion was followed by refinement of the proforma. Two rese…
Video elicitation interviews - Counseling sessions are video taped and the video recording of the interaction is shown to the participants is used as an elicitation tool	Mirza, Harrisona, Chang, Salo, and Birman (2016), United States	Making Sense of Three-way Conversations: A Qualitative Study of Cross-cultural Counseling with Refugee Men	International Journal of Intercultural Relations	- Male Iraqi and Bhutanese refugees were invited to participate if they self-disclosed a previous or current substance use problem during focus groups in a previous study, or information indicating a high risk of substance use. Substance use was defined as repeated use of alcohol, drugs or medication that interferes with health, daily life activities and/or responsibilities at home or work. Clien…	Mental health; Intercultural communication in mental health care; Immigrant and refugee health	- Clients engaged in an interpreter-mediated counseling session. Two standard assessments were conducted during the counseling sessions. Counseling sessions were videotaped and observed in real time through a one-way mirror. Researchers recorded field notes following a structured observation guide that included remarks on nonverbal gestures, overall power dynamic, rapport between dyads, duration …	- Data analysis was completed by the first two authors, beginning with an independent review of field notes and transcripts. During this process, preliminary themes emerged from the structured categories used for writing field notes. - To gain deeper insights into emerging themes, researchers rewatched videos of each counseling session and created a summary of each session. Summaries of counselin…
Participatory Video - A 3 stage technique - Stage A is concerned with the interaction between participants (video makers), Stage B is concerned with expression, reflection and building agency, during which participants share and reflect on their experiences and concerns, and Stage C is concerned with exercising this agency and beyond.	Peters, Zweekhorst, Van Brakel, Bunders, and Irwanto (2016), Indonesia	People Like Me Don't Make Things Like That': Participatory Video as a Method for Reducing Leprosy-related Stigma	Global Public Health	- Cirebon District is located in Indonesia on the north coast of West Java, bordering Central Java. It has a relatively high number of new leprosy cases each year and more leprosy-related stigma than in other districts, and no other initiatives to address this. Videos took place in Kedawung sub-district, Astana Japura and Lemang Abang. - Criteria for participation were sufficient proficiency in B…	Stigma; Leprosy	- The study included two participatory video stages and was developed using ‘Insights into Participatory Video: Handbook for the Field’ by Lunch and Lunch as a guideline. - The first stage included 8 people with varying impairments, and the second stage included 4 people with a leprosy related impairment. Two videos were produced (group videos) - The participants were taught about filming and vid…	‘- The interviews were recorded, transcribed verbatim or comprehensively summarized with important quotes translated into English. - NVivo was used for data management and analysis.
Video-recorded go-alongs and video-recorded film-elicitation sessions - Go-along itineraries were chosen by the patients and were accompanied by a friend, a member of the family or a member of the research team. For the video-elicitation sessions, patients were shown the videos of their walks and asked to freely comment on them.	Söderström, Söderström, Codeluppi, Empson, Conus (2017), Switzerland	Emplacing Recovery: How Persons Diagnosed with Psychosis Handle Stress in Cities	Psychosis	- Ten patients were recruited from a specialized early psychosis program for psychotic disorders in the city of Lausanne, Switzerland. The urban region of Lausanne is Switzerland’s fifth largest, with a population of 335,000 inhabitants in 2014. - Patients are routinely assessed every 6 months over a treatment period of 36 months. Only those patients with diagnoses of schizophrenia or non-affecti…	Stress; Environment and neighborhood effects on health; Mental health	‘- Video-recorded go-alongs were completed, where itineraries were chosen by the patients who were accompanied by a friend, a member of the family or, if nobody else was available, by a member of the research team. -The video recordings were used for guiding the discussion during the film-elicitation section - During the video-recorded film-elicitation sessions, patients were shown the videos of …	‘- All video-elicitation interviews were transcribed and thematically coded. - Thematic coding was done on the basis of three elements: (a) themes that resulted from a previous preparatory interview-based study with a group of patients involved in the same program (Söderström, 2016), (b) themes that emerged from the analysis of the interview transcripts and (c)themes that emerged from the previou…
Digital storytelling - In structured workshops, participants create short video narratives that are illustrated with photographs, drawings, music, and text. Cell- philms - A form of participatory video of which participants use cell phones or tablets like iPads to create short films. They involve participants in planning, performing, and recording productions that address an aspect of the issue b…	Treffry-Goatley, Wiebesiek, De Lange, and Moletsane (2017), South Africa	Technologies of Nonviolence Ethical Participatory Visual Research with Girls	Girlhood Studies	- Participants completed a workshop as part of larger ongoing work in a six-year, international, and interdisciplinary project entitled, “Networks for Change and Wellbeing: Girl-Led ‘From the Ground Up’ Policy Making in Addressing Sexual Violence in Canada and South Africa”. - The workshop was held in Khethani, a settlement established in the late 1990s, made up of low-cost government and informa…	Sexual Violence; Adolescent health	- A workshop was held to explore to visual methodologies, cellphilms and digital story creations. An entry-level tablet computer that functions in much the same way as smartphones was provided for filming. - The participants learned how to use the tablets as sound recorders, still cameras, video cameras, and video editors using WeVideo, the free software program we had installed on the tablets. -…	N/A
